# Supplementary material for: Effect of epidural spinal cord stimulation after chronic spinal cord injury on volitional movement and cardiovascular function: study protocol for the phase II open label controlled E-STAND trial
Source: HighWire-hosted journal article supplement (doi:10.1136/bmjopen-2021-059126), 2022-07-01
Supplement: bmjopen-2021-059126supp002_data_supplement.pdf [file bmjopen-2021-059126supp002_data_supplement.pdf]

|                                               | Screening       | Enrollment      | Intervention          | Post-Op         | Follow Up         | Close          |
|-----------------------------------------------|-----------------|-----------------|-----------------------|-----------------|-------------------|----------------|
| TIMEPOINT*                                    | -t <sub>2</sub> | -t <sub>1</sub> | 0                     | t <sub>po</sub> | t <sub>1-12</sub> | t <sub>x</sub> |
| <b>ENROLLMENT:</b>                            |                 |                 |                       |                 |                   |                |
| Eligibility screen**                          | X               |                 |                       |                 |                   |                |
| Informed consent                              | X               |                 |                       |                 |                   |                |
| Screening Tilt Table                          |                 |                 |                       |                 |                   |                |
| Screening EMG                                 |                 |                 |                       |                 |                   |                |
| Spine Imaging Review                          |                 | X               |                       |                 |                   |                |
| <b>INTERVENTIONS:</b>                         |                 |                 |                       |                 |                   |                |
| Stimulator Implantation                       |                 |                 | X                     |                 |                   |                |
| Settings Mapping                              |                 |                 |                       | X               | X                 |                |
| Home Training                                 |                 |                 |                       |                 | X                 |                |
| <b>ASSESSMENTS:</b>                           |                 |                 |                       |                 |                   |                |
| Medical Information ***                       | X               | X               |                       |                 | X                 | X              |
| Baseline Information †                        |                 | X               |                       |                 |                   |                |
| Safety Measures ††                            | X               | X               |                       | X               | X                 | X              |
| Brain Motor Control Assessment                |                 | X               |                       |                 | X                 | X              |
| International SCI Pain Subset                 | X               |                 |                       | X               | X                 | X              |
| Modified Ashworth Scale                       |                 | X               |                       |                 | X                 | X              |
| Penn Spasm Frequency Scale                    |                 | X               |                       | X               | X                 | X              |
| PHQ-9                                         | X               |                 |                       | X               | X                 | X              |
| Neurogenic Bowel Dysfunction Score            |                 | X               |                       | X               | X                 | X              |
| Neurogenic Bladder Symptom Score              |                 | X               |                       | X               | X                 | X              |
| WHO-QOL BREF                                  |                 | X               |                       | X               | X                 | X              |
| International SCI QoL Basic Data Set          |                 | X               |                       | X               | X                 | X              |
| Epworth Sleepiness Scale                      |                 | X               |                       | X               | X                 | X              |
| AD-HR QoL                                     |                 | X               |                       | X               | X                 | X              |
| Incontinence QoL                              |                 | X               |                       | X               | X                 | X              |
| Qualiveen 30                                  |                 | X               |                       | X               | X                 | X              |
| Female Sexual Function Index                  |                 | X               |                       | X               | X                 | X              |
| Female Sexual Distress Scale                  |                 | X               |                       | X               | X                 | X              |
| IIEF-15                                       |                 | X               |                       | X               | X                 | X              |
| Orgasm Rating Scale                           |                 | X               |                       | X               | X                 | X              |
| 24 Hour Blood Pressure                        |                 |                 | One time <sup>b</sup> |                 |                   |                |
| Cardiovascular Assessments <sup>a</sup>       |                 | X               |                       | X               | Three Times       |                |
| Visual Neurocognitive Assessment <sup>a</sup> |                 | X               |                       | X               | Three Times       |                |

\* Timepoints: -t<sub>2</sub> = within 1 year of enrollment. -t<sub>1</sub> = between initial visit and intervention. t<sub>po</sub> = 10-14 days after intervention. t<sub>1-12</sub> are spaced 1 month apart for each visit. t<sub>x</sub> occurs on the last monthly visit unless patient participation is terminated early.

\*\* Eligibility Screen includes these elements from the NINDS-CDE for Spinal Cord Injury: Demographics, History of Injury, Other Investigational Treatments, Alcohol and Tobacco Use, Substance Use, AUDIT-C, NINDS Myotatic Reflex Scale, and ISNCSCI

\*\*\* Medical Information includes these elements from NINDS-CDE for Spinal Cord Injury: Medical History, Prior and Concomitant Medications, Recent Hospitalizations or Procedures, and Surgical or Procedural Interventions

† Baseline Information includes these elements from NINDS-CDE for Spinal Cord Injury: Family History, Rehabilitation Therapies, Clinical Assessment, Braden Scale for Predicting Pressure Sore Risk, Lipid Profile, Capabilities of Upper Extremities Questionnaire, Spinal Cord Independence Measure, Wheelchair Skills Test Questionnaire, Assistive / Mobility Devices and Orthoses

†† Safety Measures include these elements from NINDS-CDE for Spinal Cord Injury: Physical Exam, Vital Signs and Tests, Modified Ashworth Scale, Falls Diary, SAE Monitoring

a: These assessments occur only in participants with a positive screening tilt table assessment

b: This assessment can be performed at any time prior to the 6 month visit
